# Supplementary material
Source: MDPI journal article supplement (https://www.mdpi.com/2073-4433/9/2/49)
Supplement: s1 [file s1]

Table S1 Emission inventories conducted in Bogotá during the period 2000-2012

| Year | Included sectors                                                                            | Methods*                                  | Pollutants                                                                                                          | Reference                                                                             |
|------|---------------------------------------------------------------------------------------------|-------------------------------------------|---------------------------------------------------------------------------------------------------------------------|---------------------------------------------------------------------------------------|
| 2001 | Industrial, mobile                                                                          | US-EPA AP-42                              | CO, NO <sub>x</sub> , SO <sub>x</sub> , CO <sub>2</sub>                                                             | INAMCO, 2001                                                                          |
| 2002 | Industrial, mobile                                                                          | AIREMIS, CORINAIR, US-EPA AP-42           | CO, NO <sub>x</sub> , VOC, CO <sub>2</sub>                                                                          | (Zárate et al., 2007)                                                                 |
| 2002 | Biogenic                                                                                    | GloBEIS 3.2                               | VOC                                                                                                                 | (Cárdenas, 2012)                                                                      |
| 2004 | Industrial, mobile, area                                                                    | Air quality model                         | CO, NO <sub>x</sub> , SO <sub>x</sub> , PM <sub>10</sub> , VOC, CO <sub>2</sub> , CH <sub>4</sub>                   | DAMA-Uniandes, 2004                                                                   |
| 2005 | Mobile                                                                                      | California FE                             | CO, NO <sub>x</sub> , CO <sub>2</sub> , N <sub>2</sub> O, CH <sub>4</sub>                                           | Behrentz, 2005                                                                        |
| 2005 | Mobile                                                                                      | IVE, field work                           | CO, NO <sub>x</sub> , SO <sub>x</sub> , PM <sub>10</sub> , VOC, CO <sub>2</sub> , N <sub>2</sub> O, CH <sub>4</sub> | (Giraldo Amaya and Behrentz, 2005)                                                    |
| 2008 | Mobile                                                                                      | IVE, direct measurement                   | CO, NO <sub>x</sub> , PM <sub>10</sub> , VOC, CO <sub>2</sub>                                                       | (Rodríguez and Behrentz, 2009)                                                        |
| 2008 | Industrial                                                                                  | direct measurement                        | NO <sub>x</sub> , SO <sub>x</sub> , PM <sub>10</sub>                                                                | (Fandiño and Behrentz, 2009)                                                          |
| 2008 | Industrial, mobile                                                                          | EMISENS, COPERT IV, US-EPA AP-42          | CO, NO <sub>x</sub> , SO <sub>x</sub> , PM <sub>10</sub>                                                            | (Rojas and Peñaloza, 2010)                                                            |
| 2010 | Resuspended dust                                                                            | US-EPA AP-42                              | PM <sub>10</sub> , PM <sub>2.5</sub>                                                                                | (Beltran et al., 2012)                                                                |
| 2011 | Industrial, mobile, biogenic, area (PTAR, RSDJ <sup>&amp;</sup> )                           | IVE, US-EPA AP-42, Megan, Landgem, Water9 | VOCs                                                                                                                | (UDEC - Universidad de Cundinamarca and SDA - Secretaría Distrital de Ambiente, 2011) |
| 2012 | Industrial, commercial, mobile, biogenic, resuspended dust, gas stations, gas storage tanks | EMISENS, COPERT IV, AP-42, MEGAN, Tanks   | CO, NO <sub>x</sub> , PM <sub>10</sub> , VOCs, SO <sub>2</sub> , CO <sub>2</sub>                                    | This project                                                                          |

<sup>&</sup> PTAR: Bogotá's waste water treatment facility El Salitre; RSDJ: Bogotá's solid waste landfill Doña Juana
